# Supplementary material
Source: PubMed Central journal article supplement (PMC3482157)
Supplement: NIHMS402932-supplement-1_si_001.pdf [file NIHMS402932-supplement-1_si_001.pdf]

## Supporting Information for “Metavanadate at the active site of the phosphatase VHZ”

Vyacheslav I. Kuznetsov,<sup>a</sup> Anastassia N. Alexandrova,<sup>\*b</sup> and Alvan C. Hengge<sup>\*a</sup>

<sup>a</sup>*Department of Chemistry and Biochemistry, Utah State University, Logan, UT  
84322-0300*

<sup>b</sup>*Department of Chemistry and Biochemistry, University of California, Los  
Angeles, CA 90095-1569*

Below are the absolute energies (in Hartrees) and the atomic coordinates of the structures that were computationally analyzed. The coordinates were obtained from the x-ray structure.

### Complex shown in Figure 2A:

E(B3LYP/6-31G\*) = -5421.28129098

|   |           |           |           |
|---|-----------|-----------|-----------|
| C | -2.564078 | 6.097605  | -2.147937 |
| C | -2.074282 | 4.809721  | -2.298077 |
| C | -2.828828 | 3.841212  | -2.936995 |
| C | -4.073112 | 4.184683  | -3.423734 |
| C | -4.564762 | 5.465201  | -3.268804 |
| C | -3.806093 | 6.421611  | -2.631369 |
| C | -2.315088 | 2.454911  | -3.101813 |
| C | -3.178162 | 1.397957  | -2.402183 |
| C | -2.845657 | 0.007788  | -2.952113 |
| O | -3.652161 | -0.583823 | -3.667401 |
| N | -3.103828 | 1.543927  | -0.941127 |
| C | -4.186200 | 1.758800  | -0.201678 |
| O | -5.342292 | 1.748475  | -0.648949 |
| C | -3.991763 | 2.009069  | 1.284148  |
| N | -2.643245 | 2.312415  | 1.734752  |
| C | -2.156038 | 3.555649  | 1.711129  |
| O | -2.811871 | 4.525966  | 1.325986  |
| C | -0.711852 | 3.757697  | 2.159414  |
| C | 0.139054  | 4.047198  | 0.919841  |
| C | 1.604621  | 4.421267  | 1.126244  |
| C | 1.817242  | 5.327482  | 2.313061  |
| N | -0.168211 | 2.644116  | 2.945790  |
| C | 0.065405  | 2.731680  | 4.255662  |
| O | -0.222864 | 3.729175  | 4.930432  |
| C | 0.702578  | 1.486602  | 4.903246  |
| C | 2.208904  | 1.429259  | 4.622323  |
| N | 0.038880  | 0.261248  | 4.467666  |
| C | -1.157248 | -0.032245 | 4.961671  |
| O | -1.698806 | 0.657185  | 5.826250  |
| C | -1.853628 | -1.304514 | 4.472887  |
| N | -3.291855 | -1.056816 | 4.482188  |
| C | -1.360245 | -1.841526 | 3.108760  |

|   |           |           |           |
|---|-----------|-----------|-----------|
| S | -1.835093 | -0.855900 | 1.673917  |
| V | 0.198156  | -0.347226 | 0.543004  |
| O | 0.639040  | -1.848475 | -0.195223 |
| O | -0.408457 | 0.847159  | -0.483213 |
| O | 1.124727  | 0.154276  | 1.848070  |
| C | 2.170170  | 5.052550  | -0.139512 |
| N | -1.666263 | -0.511593 | -2.655395 |
| C | -1.184227 | -1.724278 | -3.297674 |
| C | -1.768774 | -2.997412 | -2.727347 |
| O | -2.611233 | -3.650042 | -3.354617 |
| N | -1.342354 | -3.346069 | -1.520591 |
| C | -1.856383 | -4.536348 | -0.860530 |
| C | -3.360347 | -4.421715 | -0.633147 |
| O | -4.108995 | -5.362964 | -0.917708 |
| C | -1.090184 | -4.757891 | 0.449855  |
| C | 0.388416  | -5.150963 | 0.229796  |
| C | 1.215266  | -5.066767 | 1.501703  |
| N | 1.551456  | -3.683642 | 1.851085  |
| C | 2.250850  | -3.333675 | 2.930953  |
| N | 2.518622  | -2.051964 | 3.179963  |
| N | -3.798787 | -3.260691 | -0.156681 |
| C | -5.209695 | -3.008286 | 0.089763  |
| C | -6.025967 | -3.105870 | -1.196346 |
| O | -5.655896 | -2.518798 | -2.199737 |
| N | 2.690387  | -4.265005 | 3.773083  |
| C | -5.405523 | -1.614876 | 0.724107  |
| O | -4.935639 | -1.659815 | 2.073267  |
| C | -6.865303 | -1.197231 | 0.749411  |
| O | -7.063408 | -3.773521 | -1.242127 |
| N | 2.912325  | 0.452939  | -0.974720 |
| C | 3.663337  | 1.545394  | -0.919259 |
| N | 3.545988  | 2.482147  | -1.856543 |
| N | 4.546597  | 1.707043  | 0.060695  |
| C | 5.422844  | 2.869734  | 0.166581  |
| C | 6.387897  | 2.756612  | 1.330761  |
| C | 5.706988  | 3.008483  | 2.669403  |
| O | 1.942221  | 2.044727  | -4.103413 |
| C | 1.503987  | 0.880095  | -4.282680 |
| O | 1.615513  | -0.025316 | -3.430465 |
| C | 0.834520  | 0.551134  | -5.594611 |
| C | 1.533546  | -0.579303 | -6.317362 |
| O | 5.363528  | -0.578767 | 1.505494  |
| C | 4.959816  | -1.690444 | 1.095837  |
| O | 3.993422  | -1.819585 | 0.308681  |
| C | 5.710443  | -2.922476 | 1.561836  |
| C | 5.098360  | -4.224968 | 1.051585  |

|   |           |           |           |
|---|-----------|-----------|-----------|
| C | 6.216263  | 0.643233  | -2.934691 |
| C | 5.598078  | 0.022967  | -4.005037 |
| C | 5.633930  | -1.358612 | -4.119179 |
| C | 6.283716  | -2.134160 | -3.165843 |
| C | 6.888214  | -1.500961 | -2.090181 |
| C | 6.853870  | -0.113721 | -1.971079 |
| C | 6.302191  | -3.623501 | -3.287680 |
| H | 4.104848  | -4.115862 | 1.069705  |
| H | 5.705043  | -2.939110 | 2.561872  |
| H | 6.652879  | -2.864288 | 1.233526  |
| H | 7.051832  | -3.978678 | -2.729838 |
| H | 6.457311  | -3.861909 | -4.245958 |
| H | 5.186899  | -1.802454 | -4.896487 |
| H | 5.126250  | 0.570192  | -4.696387 |
| H | 6.201896  | 1.640568  | -2.858431 |
| H | 7.289773  | 0.333493  | -1.190166 |
| H | 7.353614  | -2.046095 | -1.393309 |
| H | -3.643441 | -0.240423 | 4.024463  |
| H | -1.614621 | -2.044477 | 5.102165  |
| H | -0.361489 | -1.884784 | 3.136593  |
| H | -1.730929 | -2.761978 | 2.987507  |
| H | 0.479126  | -0.347375 | 3.807347  |
| H | 0.577042  | 1.562436  | 5.892545  |
| H | 2.638512  | 2.278941  | 4.929531  |
| H | 2.361494  | 1.314877  | 3.640217  |
| H | 2.611146  | 0.656060  | 5.113326  |
| H | 0.035401  | 1.783030  | 2.479621  |
| H | -0.689231 | 4.534758  | 2.788130  |
| H | 0.119238  | 3.227482  | 0.348217  |
| H | -0.294972 | 4.804410  | 0.431812  |
| H | 2.097503  | 3.573545  | 1.323611  |
| H | 3.129897  | 5.293020  | 0.007048  |
| H | 1.650798  | 5.877830  | -0.361966 |
| H | 2.101692  | 4.401797  | -0.895880 |
| H | 2.790171  | 5.539210  | 2.400579  |
| H | 1.500385  | 4.869409  | 3.143309  |
| H | 1.301839  | 6.174811  | 2.182856  |
| H | -2.064508 | 1.569458  | 2.071884  |
| H | -4.294251 | 1.188573  | 1.769831  |
| H | -4.574509 | 2.780846  | 1.538133  |
| H | -2.213194 | 1.479784  | -0.490838 |
| H | -4.146067 | 1.536835  | -2.610536 |
| H | -1.391624 | 2.412522  | -2.721526 |
| H | -2.283865 | 2.242885  | -4.078364 |
| H | -4.625643 | 3.496791  | -3.894918 |
| H | -5.471948 | 5.698254  | -3.619004 |

|   |           |           |           |
|---|-----------|-----------|-----------|
| H | -4.159995 | 7.350616  | -2.521352 |
| H | -2.011251 | 6.791787  | -1.686771 |
| H | -1.168424 | 4.578711  | -1.942246 |
| H | -1.091731 | -0.060059 | -1.973113 |
| H | -1.417379 | -1.679104 | -4.269589 |
| H | -0.190397 | -1.761200 | -3.194248 |
| H | -0.657733 | -2.782962 | -1.057527 |
| H | -1.714022 | -5.334325 | -1.445667 |
| H | -1.118162 | -3.911535 | 0.981588  |
| H | -1.540473 | -5.489146 | 0.961545  |
| H | 0.421523  | -6.090689 | -0.111435 |
| H | 0.785364  | -4.534370 | -0.450413 |
| H | 0.693399  | -5.470835 | 2.253064  |
| H | 2.062903  | -5.580716 | 1.369386  |
| H | 1.236286  | -2.956607 | 1.241177  |
| H | 3.215010  | -3.999812 | 4.582146  |
| H | 2.496436  | -5.230006 | 3.596297  |
| H | 3.043513  | -1.800004 | 3.992505  |
| H | 2.194125  | -1.342341 | 2.554012  |
| H | -3.136784 | -2.537093 | 0.038861  |
| H | -5.535402 | -3.709472 | 0.723539  |
| H | -4.898375 | -0.953515 | 0.172399  |
| H | -6.946564 | -0.291886 | 1.166792  |
| H | -7.392686 | -1.858153 | 1.283460  |
| H | -7.220029 | -1.165572 | -0.185109 |
| H | -5.056209 | -0.762827 | 2.498372  |
| H | 1.618130  | -1.351587 | -5.687042 |
| H | 2.445032  | -0.265536 | -6.585061 |
| H | 0.847665  | 1.364528  | -6.177001 |
| H | -0.111991 | 0.284000  | -5.416235 |
| H | 5.229480  | 2.176840  | 2.954108  |
| H | 5.048045  | 3.753336  | 2.565536  |
| H | 7.118584  | 3.428507  | 1.210372  |
| H | 6.778580  | 1.835889  | 1.336898  |
| H | 4.860315  | 3.686151  | 0.293082  |
| H | 5.947913  | 2.954557  | -0.679509 |
| H | 4.614491  | 0.996552  | 0.761104  |
| H | 2.883617  | 2.367963  | -2.596805 |
| H | 4.120282  | 3.300496  | -1.820645 |
| H | 2.249991  | 0.338708  | -1.715007 |
| H | 3.008410  | -0.256297 | -0.276513 |
| H | 6.455486  | 3.281923  | 3.411631  |
| H | 5.403442  | -5.046927 | 1.697518  |
| H | 5.442600  | -4.414406 | 0.035941  |
| H | 5.354065  | -4.028215 | -2.936703 |
| H | 0.947721  | -0.870826 | -7.187849 |

|   |           |           |          |
|---|-----------|-----------|----------|
| H | -3.921634 | -1.728595 | 4.072121 |
| H | -3.778547 | -0.946061 | 5.357932 |

**Complex shown in Figure 2B:**

E(B3LYP/6-31G\*) = -4901.42875623

|   |           |           |           |
|---|-----------|-----------|-----------|
| C | 1.727809  | -3.634447 | 0.694462  |
| C | 1.534656  | -4.937697 | 1.214981  |
| C | 0.789643  | -5.177939 | 2.374034  |
| C | 0.238858  | -4.058681 | 2.966769  |
| C | 0.418934  | -2.772195 | 2.447145  |
| C | 1.150954  | -2.505815 | 1.300343  |
| O | 1.313912  | -1.191292 | 0.823651  |
| V | -0.178825 | -0.082110 | -0.199831 |
| O | 0.015483  | -1.328264 | -1.610982 |
| S | -2.033199 | 1.040534  | -1.380700 |
| C | -1.580835 | 1.265999  | -3.139307 |
| C | -2.523536 | 0.665752  | -4.191768 |
| C | -2.444495 | -0.853382 | -4.300928 |
| O | -3.332658 | -1.451832 | -4.889324 |
| N | -3.916007 | 0.860783  | -3.859496 |
| N | -1.421330 | -1.509442 | -3.782888 |
| C | -1.438805 | -2.971294 | -3.828894 |
| C | -2.382298 | -3.551682 | -2.733723 |
| O | -3.269642 | -4.376542 | -3.023285 |
| C | -0.018669 | -3.537010 | -3.749231 |
| O | -0.032582 | -4.954399 | -3.726518 |
| N | -2.207915 | -3.096254 | -1.491983 |
| C | -3.023011 | -3.542385 | -0.374403 |
| C | -4.176822 | -2.591690 | -0.082012 |
| O | -5.166811 | -2.987161 | 0.536400  |
| C | -2.175192 | -3.706508 | 0.870188  |
| N | -4.051352 | -1.339991 | -0.513731 |
| C | -5.115785 | -0.363870 | -0.316466 |
| C | -5.189436 | 0.276766  | 1.052562  |
| O | -6.260771 | 0.730773  | 1.450842  |
| N | -4.063602 | 0.316066  | 1.772424  |
| C | -4.009606 | 0.924449  | 3.106474  |
| C | -2.926851 | 1.995037  | 3.258521  |
| O | -3.181200 | 3.058049  | 3.800787  |
| C | -3.807687 | -0.170324 | 4.171845  |

|   |           |           |           |
|---|-----------|-----------|-----------|
| C | -5.075728 | -0.993166 | 4.336565  |
| C | -2.669698 | -1.107453 | 3.763119  |
| C | -2.385786 | -2.198536 | 4.771378  |
| N | -1.725030 | 1.718731  | 2.757149  |
| C | -0.593441 | 2.611285  | 2.950550  |
| C | -0.587122 | 3.913613  | 2.200356  |
| O | -0.758003 | 4.989356  | 2.786739  |
| N | -0.371502 | 3.818488  | 0.884910  |
| C | -0.359712 | 4.989654  | 0.048258  |
| C | -1.798885 | 5.451274  | -0.083670 |
| O | -2.078995 | 6.663586  | -0.095901 |
| C | 0.266551  | 4.703487  | -1.318377 |
| C | 1.740247  | 4.338870  | -1.261433 |
| C | 2.198336  | 3.688475  | -2.556632 |
| N | 1.849414  | 2.270835  | -2.611525 |
| C | 2.355226  | 1.411695  | -3.489091 |
| N | 1.977220  | 0.140861  | -3.463878 |
| N | -2.724702 | 4.501564  | -0.182743 |
| C | -4.139673 | 4.869363  | -0.237593 |
| N | 3.236832  | 1.822744  | -4.389483 |
| O | -1.454465 | -0.472374 | 1.160609  |
| O | 0.787256  | 1.523491  | -0.015362 |
| O | 3.576364  | -0.701956 | -0.384177 |
| C | 4.157960  | -1.433388 | -1.207098 |
| O | 3.872275  | -2.649856 | -1.357554 |
| C | 5.237784  | -0.789508 | -2.049276 |
| C | 5.362564  | 0.714788  | -1.785704 |
| C | 6.130834  | 0.988061  | -0.491544 |
| O | 7.341321  | 0.818263  | -0.438913 |
| N | 6.036255  | 1.386014  | -2.880664 |
| N | 5.415129  | 1.440272  | 0.534521  |
| C | 5.998837  | 1.741698  | 1.850364  |
| C | 6.736438  | 0.524842  | 2.429018  |
| C | 5.822616  | -0.498080 | 3.076973  |
| C | 5.221561  | -1.484802 | 2.327408  |
| C | 4.383723  | -2.419125 | 2.910239  |
| C | 4.148191  | -2.380328 | 4.244300  |
| C | 4.764458  | -1.420793 | 5.024519  |
| C | 5.592356  | -0.480179 | 4.434102  |
| H | 5.018500  | -0.929077 | -3.014395 |
| H | 6.112356  | -1.226017 | -1.838695 |
| H | 4.432811  | 1.072626  | -1.701020 |
| H | 5.541278  | 1.213516  | -3.732450 |
| H | 6.970479  | 1.037538  | -2.961593 |
| H | 4.433709  | 1.582367  | 0.405585  |
| H | 5.244703  | 1.962981  | 2.469019  |

|   |           |           |           |
|---|-----------|-----------|-----------|
| H | 7.234000  | 0.076320  | 1.686751  |
| H | 7.385253  | 0.848849  | 3.117842  |
| H | 5.394406  | -1.526631 | 1.343459  |
| H | 3.951665  | -3.122955 | 2.346899  |
| H | 3.529242  | -3.045253 | 4.663222  |
| H | 4.613424  | -1.405066 | 6.012781  |
| H | 6.027344  | 0.219745  | 4.999956  |
| H | -4.101129 | 1.838264  | -3.758141 |
| H | -4.122666 | 0.392196  | -3.001056 |
| H | -2.229159 | 1.130634  | -5.027187 |
| H | -0.680034 | 0.853199  | -3.272545 |
| H | -1.525781 | 2.249642  | -3.311284 |
| H | -0.654331 | -1.019008 | -3.369770 |
| H | -1.813222 | -3.259208 | -4.710505 |
| H | 0.499921  | -3.228665 | -4.546117 |
| H | 0.420141  | -3.202036 | -2.915675 |
| H | 0.905050  | -5.296945 | -3.674268 |
| H | -1.488633 | -2.422431 | -1.323354 |
| H | -3.412870 | -4.425399 | -0.637266 |
| H | -2.751233 | -4.013590 | 1.627892  |
| H | -1.753884 | -2.829963 | 1.105029  |
| H | -1.460050 | -4.384495 | 0.700287  |
| H | -3.211877 | -1.063271 | -0.981607 |
| H | -4.988591 | 0.365725  | -0.987907 |
| H | -5.987766 | -0.824879 | -0.484752 |
| H | -3.230657 | -0.082586 | 1.388945  |
| H | -4.885642 | 1.389256  | 3.235763  |
| H | -3.582558 | 0.280148  | 5.036399  |
| H | -2.912463 | -1.536753 | 2.893828  |
| H | -1.838998 | -0.562515 | 3.646415  |
| H | -1.634547 | -2.770261 | 4.441513  |
| H | -3.203766 | -2.760738 | 4.893921  |
| H | -2.131140 | -1.785952 | 5.646347  |
| H | -4.928209 | -1.698246 | 5.030770  |
| H | -5.307427 | -1.426487 | 3.465997  |
| H | -5.826356 | -0.397099 | 4.622366  |
| H | -1.597189 | 0.876399  | 2.234315  |
| H | -0.549340 | 2.829740  | 3.925307  |
| H | 0.228993  | 2.109908  | 2.683817  |
| H | -0.216312 | 2.919681  | 0.474956  |
| H | 0.203953  | 5.706047  | 0.458214  |
| H | -0.229242 | 3.942905  | -1.737380 |
| H | 0.166730  | 5.520203  | -1.886524 |
| H | 2.275584  | 5.168960  | -1.106957 |
| H | 1.888861  | 3.700674  | -0.505735 |
| H | 1.762803  | 4.158193  | -3.325160 |

|   |           |           |           |
|---|-----------|-----------|-----------|
| H | 3.191574  | 3.778888  | -2.629466 |
| H | 1.187679  | 1.925576  | -1.945533 |
| H | 3.616833  | 1.174727  | -5.049857 |
| H | 3.521633  | 2.780681  | -4.408593 |
| H | 2.357268  | -0.507184 | -4.124196 |
| H | 1.311902  | -0.169868 | -2.784674 |
| H | -2.455256 | 3.539183  | -0.219361 |
| H | -4.709168 | 4.054027  | -0.342018 |
| H | -4.423733 | 5.392402  | 0.565986  |
| H | -4.262434 | 5.458260  | -1.036423 |
| H | 0.603659  | -6.068417 | 2.789313  |
| H | -0.308115 | -4.171757 | 3.796790  |
| H | -0.002806 | -2.003651 | 2.929052  |
| H | 2.288940  | -3.515455 | -0.124973 |
| H | 1.945159  | -5.714058 | 0.736932  |
| H | 6.687273  | 2.582278  | 1.776871  |
| H | 6.062033  | 2.377705  | -2.701919 |
| H | -4.492953 | 0.484042  | -4.595202 |

**Complex shown in Figure 2C:**

E(B3LYP/6-31G\*) = -5203.76225829

|   |           |           |           |
|---|-----------|-----------|-----------|
| C | -4.650931 | -3.875018 | 3.942494  |
| C | -5.278665 | -4.241590 | 2.771297  |
| C | -5.628832 | -3.288152 | 1.825213  |
| C | -5.322039 | -1.959816 | 2.070362  |
| C | -4.697310 | -1.589556 | 3.237779  |
| C | -4.359132 | -2.550930 | 4.174980  |
| C | -6.284062 | -3.692621 | 0.544783  |
| C | -5.305790 | -3.787446 | -0.629041 |
| N | -5.017139 | -2.467767 | -1.186787 |
| C | -5.973152 | -1.657321 | -1.629435 |
| O | -7.177812 | -1.931931 | -1.565809 |
| C | -5.500137 | -0.338456 | -2.237071 |
| N | -6.163584 | -0.116872 | -3.514996 |
| C | -5.767077 | 0.823982  | -1.273457 |
| C | -4.801517 | 0.836201  | -0.084474 |
| O | -3.860552 | 0.006070  | -0.059148 |
| O | -4.988004 | 1.679369  | 0.825546  |
| N | -5.392620 | 4.285088  | 0.301963  |
| C | -6.239458 | 5.176589  | 1.133674  |
| O | -1.546300 | -0.181465 | 1.461650  |
| V | -0.002954 | 0.388743  | 0.152605  |
| O | 1.311197  | -0.168568 | 1.419883  |



|   |           |           |           |
|---|-----------|-----------|-----------|
| S | 1.883731  | 1.195505  | -1.300103 |
| C | 1.208610  | 2.388941  | -2.470610 |
| C | 1.920465  | 3.745262  | -2.495497 |
| C | 1.432286  | 4.689840  | -1.404799 |
| O | 1.992607  | 5.762388  | -1.233670 |
| N | 3.354112  | 3.612265  | -2.305461 |
| N | 0.404434  | 4.319671  | -0.657937 |
| C | 0.014065  | 5.166578  | 0.458862  |
| C | 0.902312  | 4.882213  | 1.672577  |
| O | 1.519655  | 5.791369  | 2.227934  |
| C | -1.465620 | 4.985311  | 0.808062  |
| O | -1.861487 | 5.957286  | 1.759792  |
| N | 0.964358  | 3.611880  | 2.064897  |
| C | 1.771541  | 3.172265  | 3.200785  |
| C | 3.186869  | 2.735966  | 2.792450  |
| O | 4.121871  | 2.765025  | 3.603494  |
| C | 1.068468  | 2.038414  | 3.921931  |
| N | 3.337482  | 2.318050  | 1.540878  |
| C | 4.626439  | 1.864789  | 1.049711  |
| C | 4.976289  | 0.426998  | 1.386249  |
| O | 6.152042  | 0.064384  | 1.412984  |
| N | 3.975371  | -0.413965 | 1.629518  |
| C | 4.275810  | -1.824306 | 1.899476  |
| C | 3.534785  | -2.870116 | 1.073520  |
| O | 4.082805  | -3.938281 | 0.783314  |
| C | 4.090591  | -2.141754 | 3.407836  |
| C | 5.089950  | -1.360034 | 4.238041  |
| C | 2.661827  | -1.829555 | 3.865084  |
| C | 2.407522  | -2.153398 | 5.337411  |
| N | 2.294956  | -2.574437 | 0.699756  |
| C | 1.439084  | -3.573991 | 0.082003  |
| C | 1.648074  | -3.702581 | -1.408919 |
| O | 2.220247  | -4.689406 | -1.894179 |
| N | 1.173176  | -2.704263 | -2.142942 |
| C | 1.410533  | -2.656178 | -3.575901 |
| C | 2.909037  | -2.485172 | -3.877756 |
| O | 3.450556  | -3.122013 | -4.782873 |
| C | 0.573782  | -1.536479 | -4.206497 |
| C | -0.927415 | -1.791855 | -4.116157 |
| C | -1.746686 | -0.549739 | -4.437622 |
| N | -1.814711 | 0.358230  | -3.288516 |
| C | -2.547265 | 1.465695  | -3.259972 |
| N | -2.552921 | 2.237516  | -2.173840 |
| N | 3.573528  | -1.628623 | -3.107339 |
| C | 5.015125  | -1.452502 | -3.238876 |
| C | 5.727304  | -2.785290 | -3.045624 |

|   |           |           |           |
|---|-----------|-----------|-----------|
| O | 6.614370  | -3.139465 | -3.819558 |
| N | -3.277831 | 1.800308  | -4.323512 |
| C | 5.530193  | -0.417249 | -2.232223 |
| O | 4.848441  | 0.817683  | -2.400596 |
| O | -0.697240 | 2.166232  | 0.117176  |
| O | -0.568146 | -0.901112 | -1.140502 |
| O | -1.164762 | -2.564030 | 2.235684  |
| C | -0.830482 | -3.039655 | 3.282536  |
| N | -0.894025 | -2.379140 | 4.389191  |
| C | -0.278291 | -4.423922 | 3.363198  |
| H | -5.748066 | 3.351992  | 0.344755  |
| H | -4.453702 | 4.299654  | 0.646145  |
| H | -5.404347 | 4.602445  | -0.646377 |
| H | -5.850005 | 0.746974  | -3.908246 |
| H | -7.153058 | -0.080039 | -3.375735 |
| H | -4.513944 | -0.387651 | -2.393155 |
| H | -5.669438 | 1.683865  | -1.774605 |
| H | -6.701274 | 0.743544  | -0.926433 |
| H | -4.065558 | -2.163636 | -1.236964 |
| H | -5.654901 | -4.403767 | -1.334921 |
| H | -4.447898 | -4.165462 | -0.280780 |
| H | -6.985674 | -3.017049 | 0.319389  |
| H | -6.711525 | -4.587106 | 0.674982  |
| H | -5.556666 | -1.263727 | 1.391916  |
| H | -4.487521 | -0.627303 | 3.409995  |
| H | -3.901734 | -2.281806 | 5.023000  |
| H | -4.408424 | -4.569225 | 4.619935  |
| H | -5.484169 | -5.205704 | 2.600969  |
| H | 3.727454  | 2.998177  | -3.000647 |
| H | 3.536822  | 3.236383  | -1.396381 |
| H | 1.709023  | 4.118632  | -3.399094 |
| H | 0.249832  | 2.546096  | -2.234880 |
| H | 1.266173  | 1.991617  | -3.386077 |
| H | -0.092955 | 3.475655  | -0.856736 |
| H | 0.140702  | 6.120018  | 0.185889  |
| H | -2.016180 | 5.089091  | -0.020439 |
| H | -1.605605 | 4.071582  | 1.190062  |
| H | -2.828644 | 5.831964  | 1.982016  |
| H | 0.435568  | 2.929220  | 1.560421  |
| H | 1.873334  | 3.958060  | 3.810922  |
| H | 1.624671  | 1.741290  | 4.697841  |
| H | 0.938567  | 1.272414  | 3.292161  |
| H | 0.178194  | 2.353723  | 4.251129  |
| H | 2.549237  | 2.315142  | 0.925327  |
| H | 4.628541  | 1.958913  | 0.054706  |
| H | 5.331769  | 2.455236  | 1.442603  |

|   |           |           |           |
|---|-----------|-----------|-----------|
| H | 3.029509  | -0.089428 | 1.628632  |
| H | 5.229613  | -1.908390 | 1.609701  |
| H | 4.253308  | -3.119656 | 3.540769  |
| H | 2.490027  | -0.854892 | 3.721499  |
| H | 2.026732  | -2.366568 | 3.308817  |
| H | 1.461918  | -1.928047 | 5.570072  |
| H | 3.028409  | -1.616306 | 5.909138  |
| H | 2.566753  | -3.127920 | 5.497141  |
| H | 4.959415  | -1.573274 | 5.205971  |
| H | 4.951048  | -0.380460 | 4.091747  |
| H | 6.018820  | -1.609694 | 3.964486  |
| H | 1.944732  | -1.649048 | 0.845280  |
| H | 1.628393  | -4.459370 | 0.505942  |
| H | 0.485833  | -3.321684 | 0.247514  |
| H | 0.645612  | -1.976296 | -1.704648 |
| H | 1.125806  | -3.523679 | -3.982658 |
| H | 0.780271  | -0.679528 | -3.734504 |
| H | 0.825847  | -1.455244 | -5.170492 |
| H | -1.169719 | -2.513980 | -4.764697 |
| H | -1.147580 | -2.090247 | -3.187529 |
| H | -1.323171 | -0.070568 | -5.206211 |
| H | -2.674087 | -0.827270 | -4.687512 |
| H | -1.277116 | 0.130157  | -2.476867 |
| H | -3.831372 | 2.633465  | -4.307986 |
| H | -3.272268 | 1.218533  | -5.137359 |
| H | -3.105821 | 3.071208  | -2.155430 |
| H | -2.004845 | 1.983040  | -1.376724 |
| H | 3.074695  | -1.095027 | -2.424139 |
| H | 5.210521  | -1.114577 | -4.159945 |
| H | 5.375555  | -0.755031 | -1.303650 |
| H | 6.509128  | -0.275296 | -2.377123 |
| H | 5.193876  | 1.482250  | -1.738686 |
| H | 5.470502  | -3.377594 | -2.281498 |
| H | -0.171569 | -4.665364 | 4.328090  |
| H | 0.615967  | -4.433411 | 2.915992  |
| H | -1.255759 | -1.447015 | 4.394571  |
| H | -0.581884 | -2.799489 | 5.241174  |
| H | -0.964588 | -5.117275 | 2.879277  |
| H | -6.226210 | 4.830426  | 2.166107  |
| H | -5.851777 | 6.193157  | 1.086655  |
| H | -7.261623 | 5.160183  | 0.758400  |
| H | -5.941132 | -0.872080 | -4.144471 |
| H | -1.402170 | -1.074746 | 1.751090  |
| H | 3.789450  | 4.517629  | -2.388291 |

**Complete citation of reference 16 in the main text:**

Frisch, M. J.; Trucks, G. W.; Schlegel, H. B.; Scuseria, G. E.; Robb, M. A.; Cheeseman, J. R.; Scalmani, G.; Barone, V.; Mennucci, B.; Petersson, G. A.; Nakatsuji, H.; Caricato, M.; Li, X.; Hratchian, H. P.; Izmaylov, A. F.; Bloino, J.; Zheng, G.; Sonnenberg, J. L.; Hada, M.; Ehara, M.; Toyota, K.; Fukuda, R.; Hasegawa, J.; Ishida, M.; Nakajima, T.; Honda, Y.; Kitao, O.; Nakai, H.; Vreven, T.; Montgomery, J. A., Jr.; Peralta, J. E.; Ogliaro, F.; Bearpark, M.; Heyd, J. J.; Brothers, E.; Kudin, K. N.; Staroverov, V. N.; Kobayashi, R.; Normand, J.; Raghavachari, K.; Rendell, A.; Burant, J. C.; Iyengar, S. S.; Tomasi, J.; Cossi, M.; Rega, N.; Millam, N. J.; Klene, M.; Knox, J. E.; Cross, J. B.; Bakken, V.; Adamo, C.; Jaramillo, J.; Gomperts, R.; Stratmann, R. E.; Yazyev, O.; Austin, A. J.; Cammi, R.; Pomelli, C.; Ochterski, J. W.; Martin, R. L.; Morokuma, K.; Zakrzewski, V. G.; Voth, G. A.; Salvador, P.; Dannenberg, J. J.; Dapprich, S.; Daniels, A. D.; Farkas, Ö.; Foresman, J. B.; Ortiz, J. V.; Cioslowski, J.; Fox, D. J. *Gaussian 09*, revision A; Gaussian, Inc.: Wallingford, CT, 2009.
